# Supplementary material for: A Liquid to Solid Phase Transition Underlying Pathological Huntingtin Exon1 Aggregation
Source: PubMed Central journal article supplement (PMC5971205; doi:10.1016/j.molcel.2018.04.007), 2018-05-17
Supplement: mmc1.pdf [file mmc1.pdf]

**Molecular Cell, Volume 70**

**Supplemental Information**

**A Liquid to Solid Phase Transition Underlying**

**Pathological Huntingtin Exon1 Aggregation**

**Thomas R. Peskett, Frédérique Rau, Jonathan O'Driscoll, Rickie Patani, Alan R. Lowe, and Helen R. Saibil**

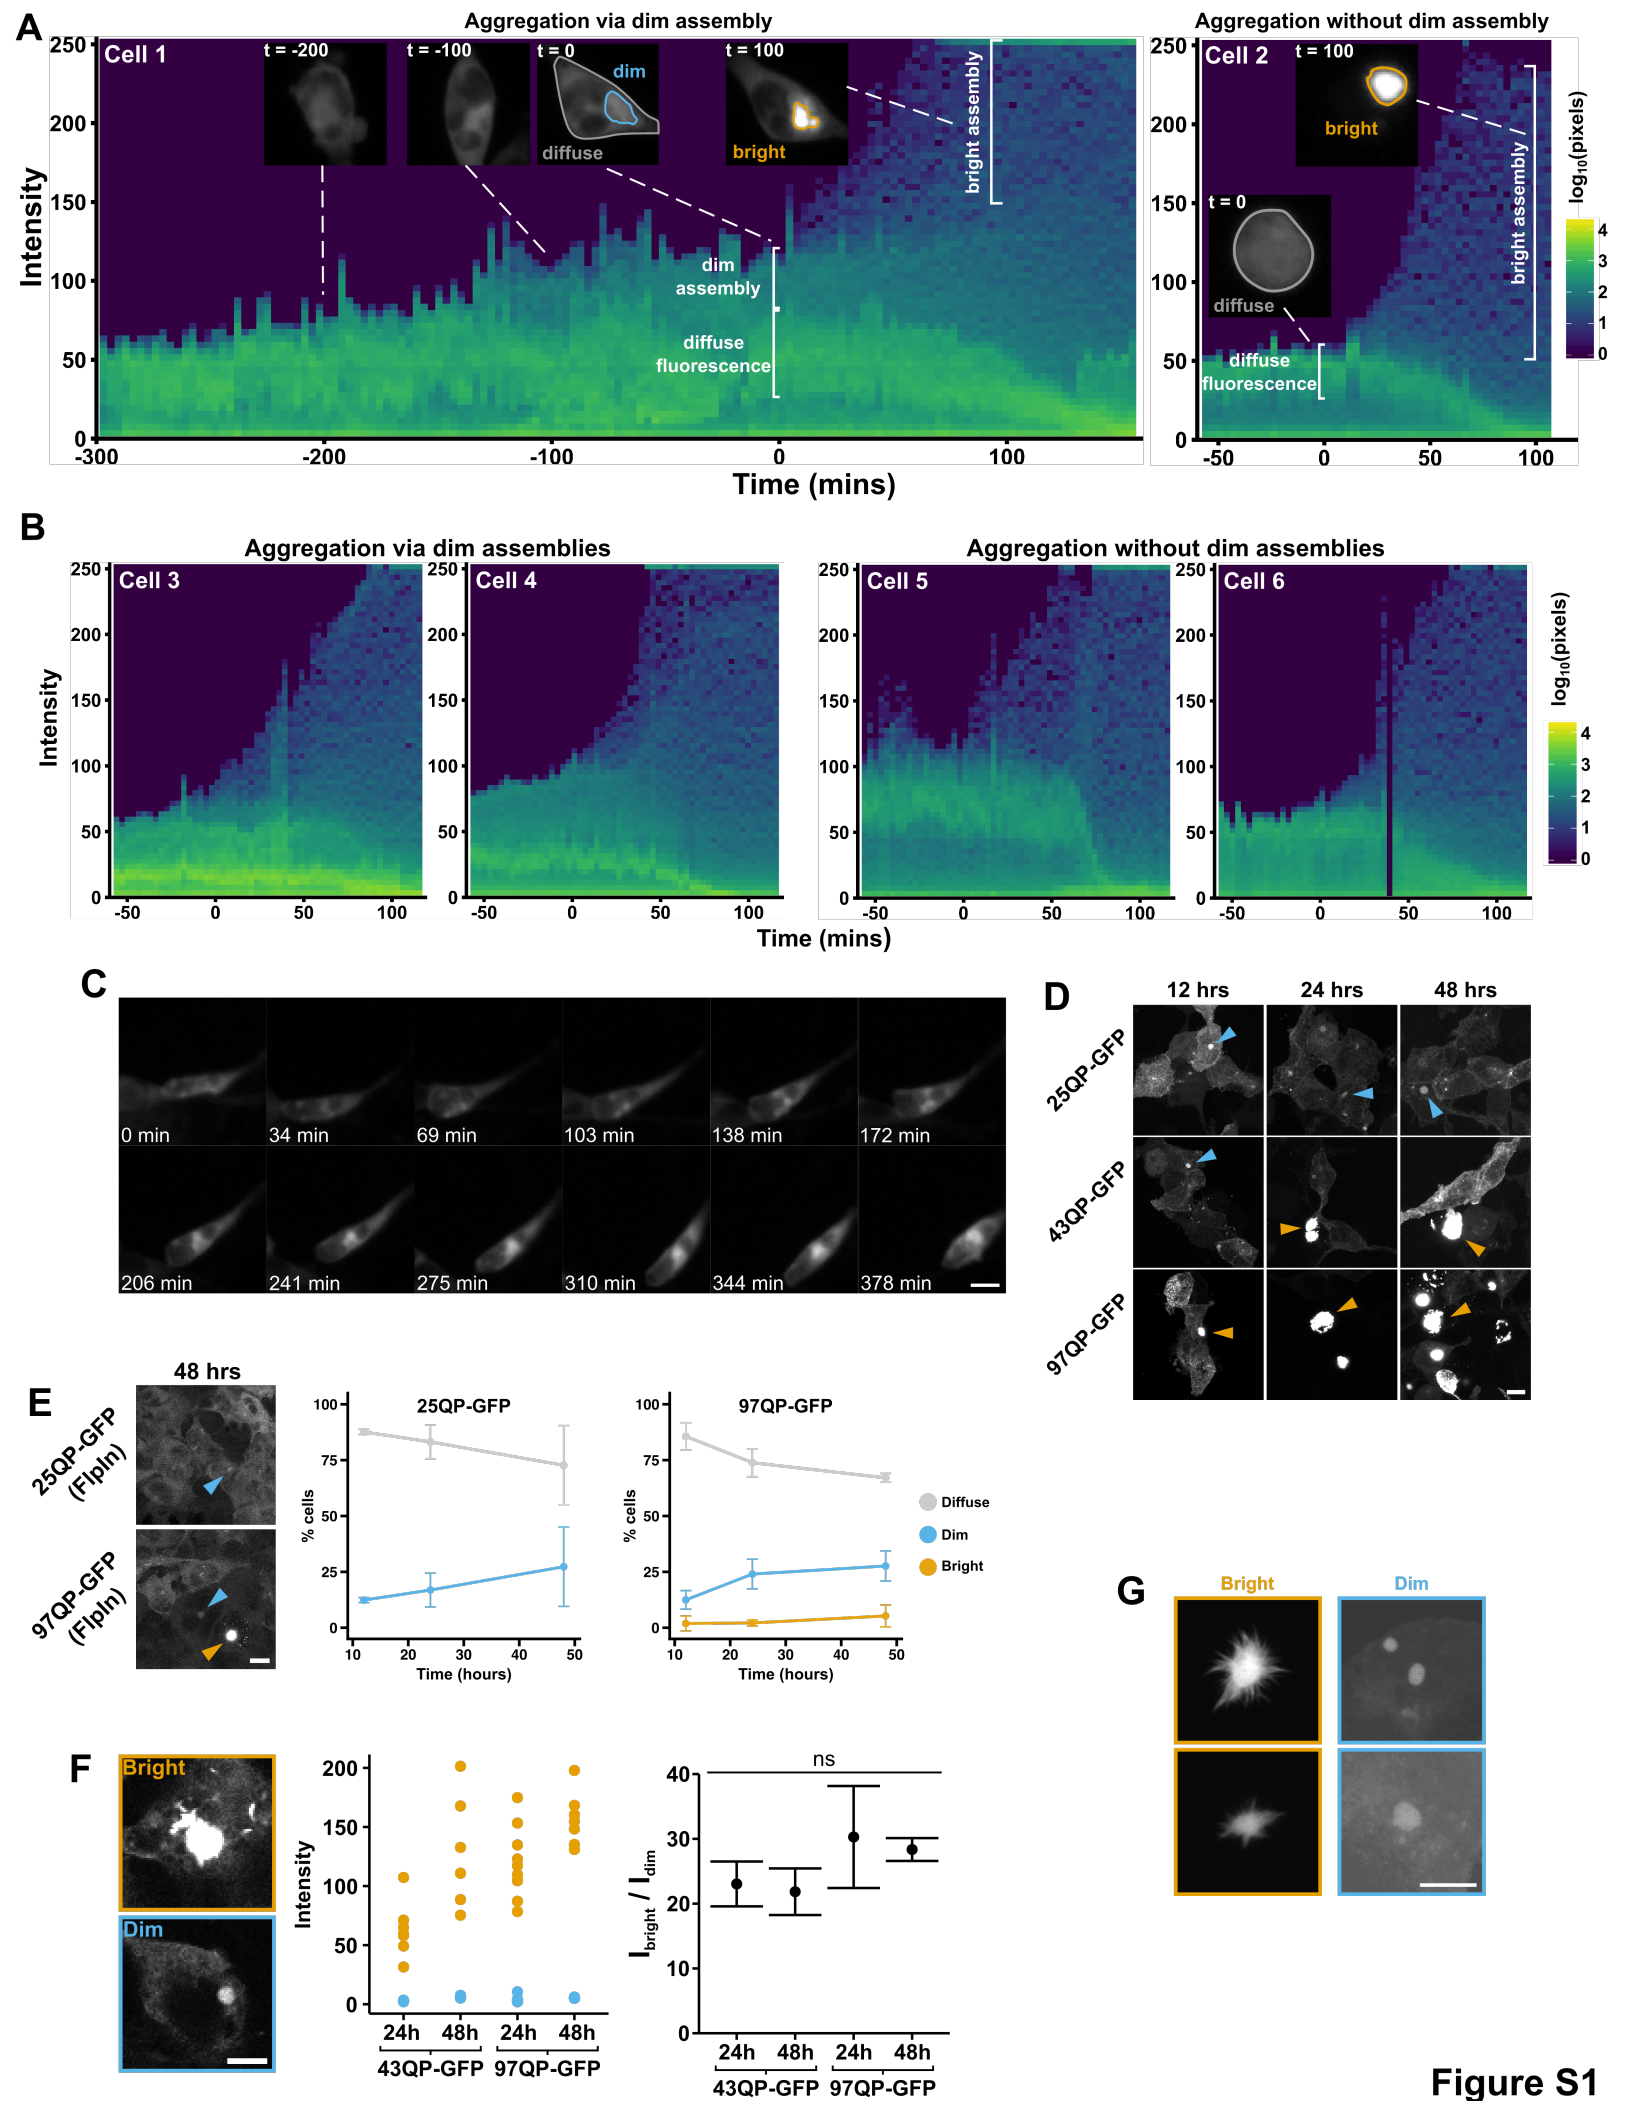

Figure S1



### Figure S1, related to Figure 1.

(A) Quantification of aggregation trajectories in single cells. Cells were computationally tracked and their fluorescence intensity distributions plotted as time-resolved histograms.  $t = 0$  is defined as the point at which a bright assembly begins to form. Formation of bright assemblies corresponds with a rapid increase ( $\sim 1$  hr) in intensities of a small subset of pixels. As bright assemblies form, highly populated intensities (diffuse fluorescence) reduce to zero in agreement with sequestration of cytoplasmic  $\text{HTT}_{\text{ex1}}$  into the forming assembly. Dim assemblies result in a subset of pixels occupying slightly higher intensities than the diffuse background fluorescence. In contrast to bright assemblies, they do not cause a loss of the cytoplasmic fluorescence. (B) Additional examples of single-cell aggregation trajectories. (C) Time-lapse fluorescence microscopy of merging 25QP-GFP assemblies. Scale bar, 10  $\mu\text{m}$ . (D) 25QP-GFP forms dim assemblies but not bright assemblies. Cells were fixed at 12, 24 and 48 hrs after inducing expression of the constructs indicated. Bright and dim assemblies are highlighted with orange and blue arrows, respectively. Scale bar, 10  $\mu\text{m}$ . (E) Quantification of fluorescent features in HEK293 Flp-In stable cell lines expressing 25QP-GFP or 97QP-GFP. Cells were fixed and imaged at 12, 24 and 48 hrs post-induction. (F) Quantification of mean intensities of bright and dim assemblies in 43QP-GFP and 97QP-GFP transfected HEK293 cells determined from confocal slices at 24 hr and 48 hr time points post-induction. The mean intensities of bright assemblies (orange) and dim assemblies (blue) cluster and do not overlap ( $p < 0.0015$ , Welch's two-sample t-test). Ratios of bright and dim intensities do not vary significantly ( $p > 0.24$ ) between experiments. Assemblies depicted were acquired with the same settings but were not used for quantification due to pixel saturation in the bright example. Quantification was done using images acquired with a lower laser power. Scale bar, 5  $\mu\text{m}$ . (G) Maximum intensity projections of confocal stacks through bright and dim assemblies. Compare the spiky, irregular edges of the bright assemblies to the smooth edges of the dim assemblies. The images of the dim assemblies have been linearly scaled for clarity. Related to Movie 2. Scale bar, 5  $\mu\text{m}$ .

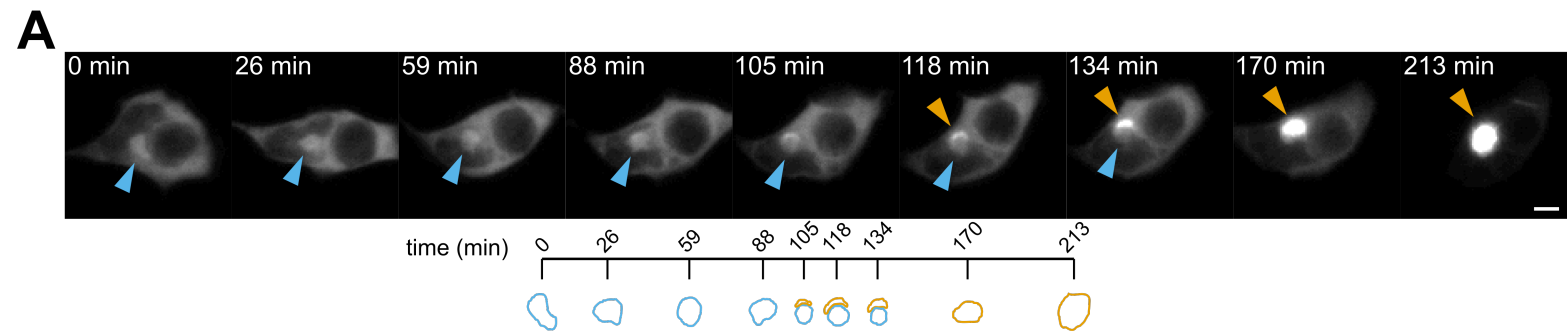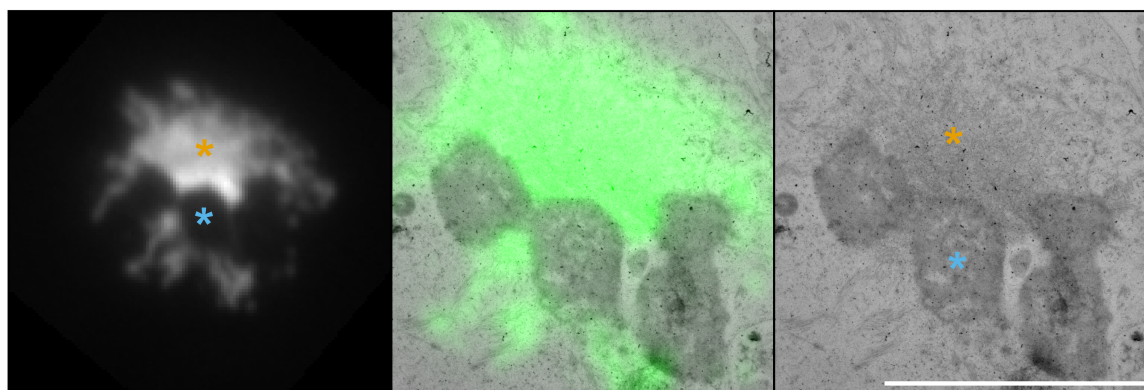

**B**

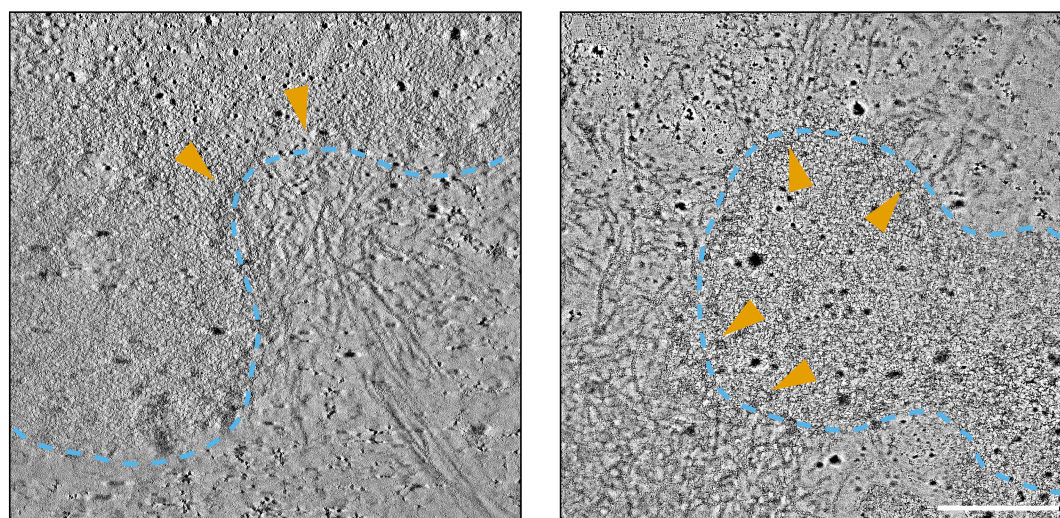

**C**

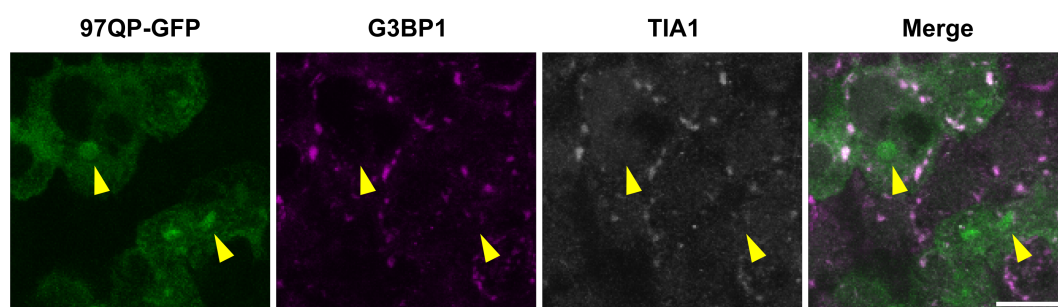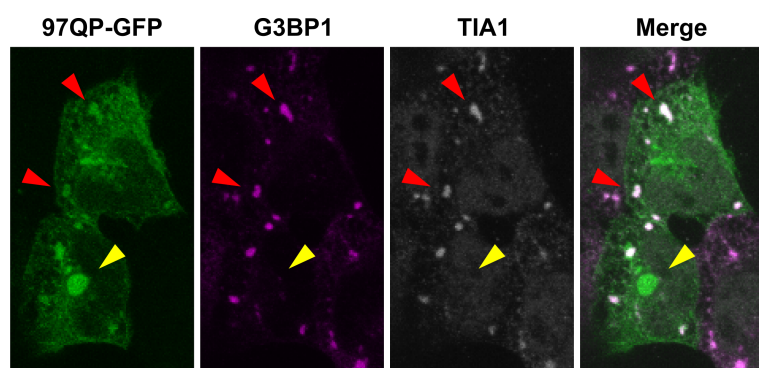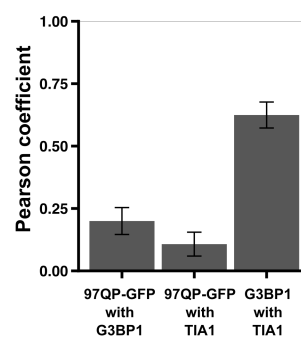

Figure S2

**Figure S2, related to Figure 1.**

(A) Images from a time-lapse fluorescence microscopy experiment (top) showing a 43QP-GFP dim assembly (blue arrows) converting to a bright assembly (orange arrows). Note the appearance of the bright assembly at the edge of the dim assembly, and sequestration of cytoplasmic fluorescence by the bright assembly. The timeline (below) shows the relative positions of the frames in time, with manually traced outlines of the dim (blue) and bright (orange) assemblies. Large panels (bottom) show, from left to right: fluorescence of a bright assembly in a 120 nm section through a cell on an electron microscopy grid; an overlay of the fluorescence with the electron micrograph of the same assembly; the electron micrograph without the fluorescence overlay. Probable dim and bright assemblies are indicated with blue and orange asterisks, respectively. Scale bars, 5  $\mu\text{m}$ . (B) Electron tomography of dim assemblies (blue dashes). Images show individual slices through tomograms. Fibres can be seen making direct contact with the edges of the dim assemblies (orange arrows). Related to Figure 11. Scale bar, 500 nm. (C) Examples of coexisting 97QP-GFP dim assemblies and arsenite-induced stress granules (immunolabelled for G3BP1 and TIA1). Yellow arrows indicate dim assemblies that do not co-localise with stress granules. Red arrows indicate dim assemblies that do co-localise with stress granules. Images are of maximum intensity projections of confocal stacks. Scale bar = 10  $\mu\text{m}$ . Graph shows Pearson coefficients for co-localisation of the proteins indicated. Pearson coefficients were calculated using the unmodified confocal stacks.

Figure S3

**A**

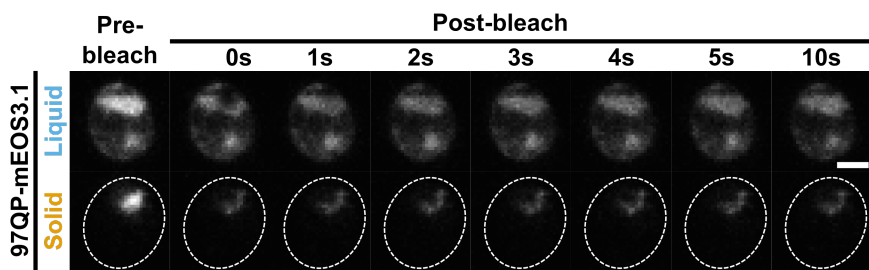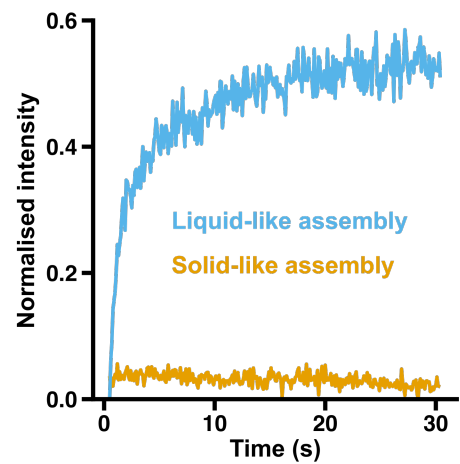

**B**

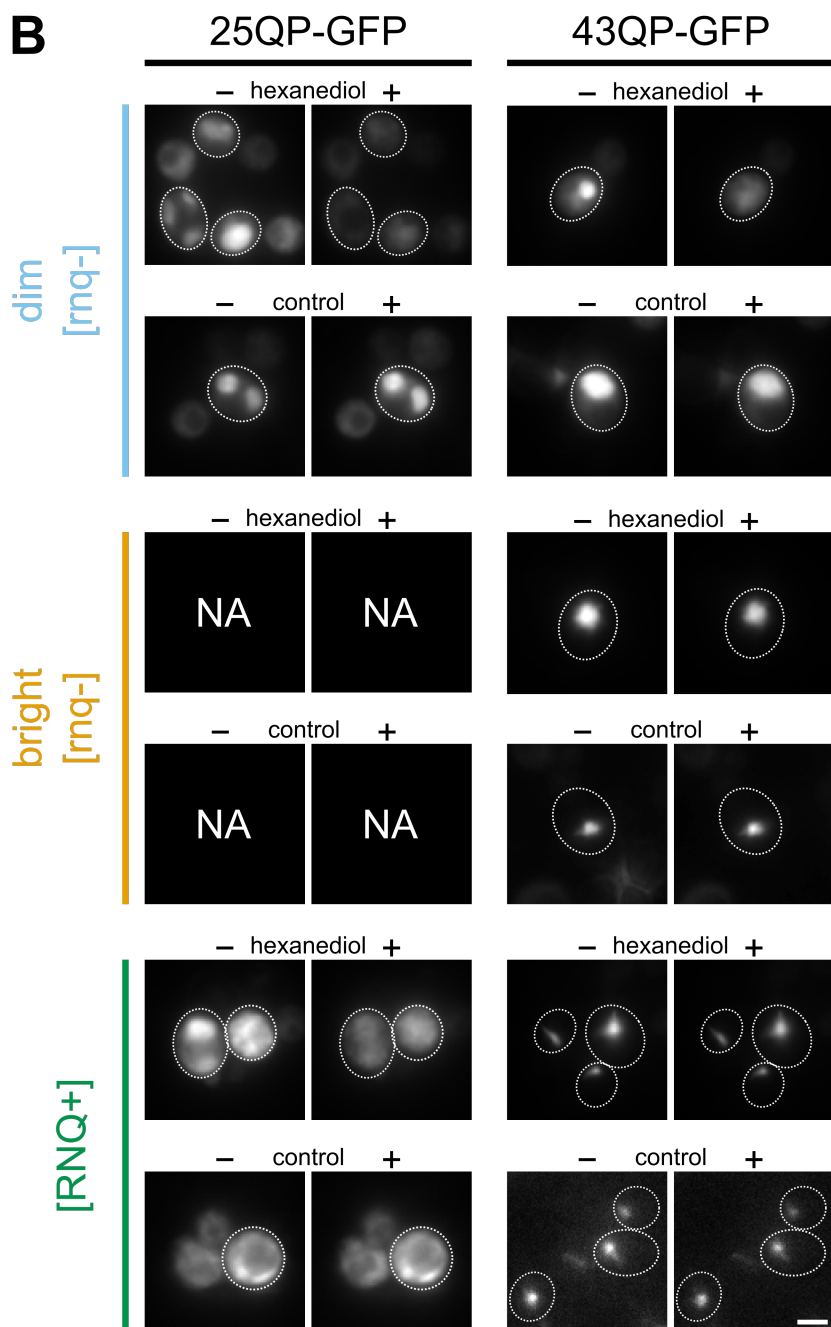

**C**

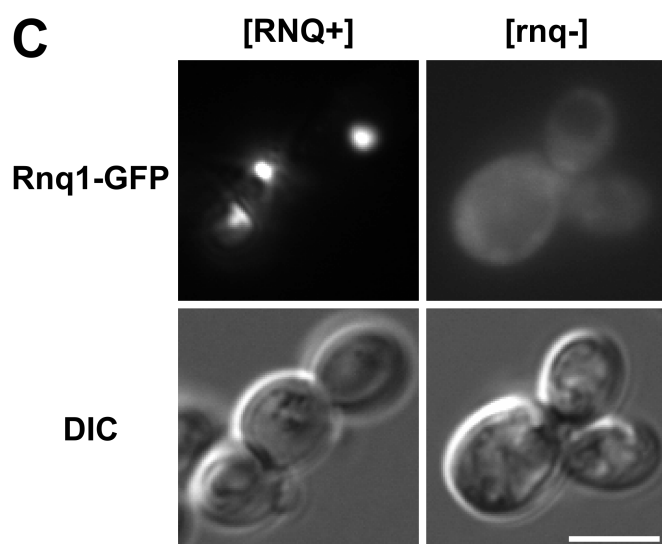

**Figure S3, related to Figures 2 and 3.**

(A) Yeast cells in the [rnq-] background expressing 97QP-mEOS3.1 were induced for 4 hrs and the resulting assemblies were probed by FRAP. Example FRAP curves show the two distinct assembly types. Note that the bleached area of the liquid-like assembly recovers rapidly and that the mobile fraction is under-represented due to the significant bleaching of the total cellular fluorescence. See also **Table S1**. (B) Fluorescence microscopy of 25QP-GFP and 43QP-GFP HTT<sub>ex1</sub> assemblies before (-) and after (+) addition of hexanediol. Controls were performed by permeabilising cells in the absence of hexanediol. White dotted outlines indicate positions of cells. Colours indicate the Rnq1 prion status and, in the case of [rnq-] cells, the type of assembly. Note that 25QP-GFP did not form SAs (panels labelled 'NA'). Scale bar, 3  $\mu$ m. (C) [RNQ+] yeast cells were cured of the prion form of Rnq1 by four passages over 5 mM Gd-HCl plates (Cox et al., 1988; see materials and methods), to generate a [rnq-] strain. Prion curing was confirmed by expressing Rnq1-GFP in both strains and visualising the distribution of Rnq1-GFP using widefield fluorescence microscopy: in the [RNQ+] strain, Rnq1-GFP formed puncta whereas in the [rnq-] strain it had a diffuse distribution. Scale bar, 5  $\mu$ m.



Figure S4

# 25QP-GFP [rnq-]

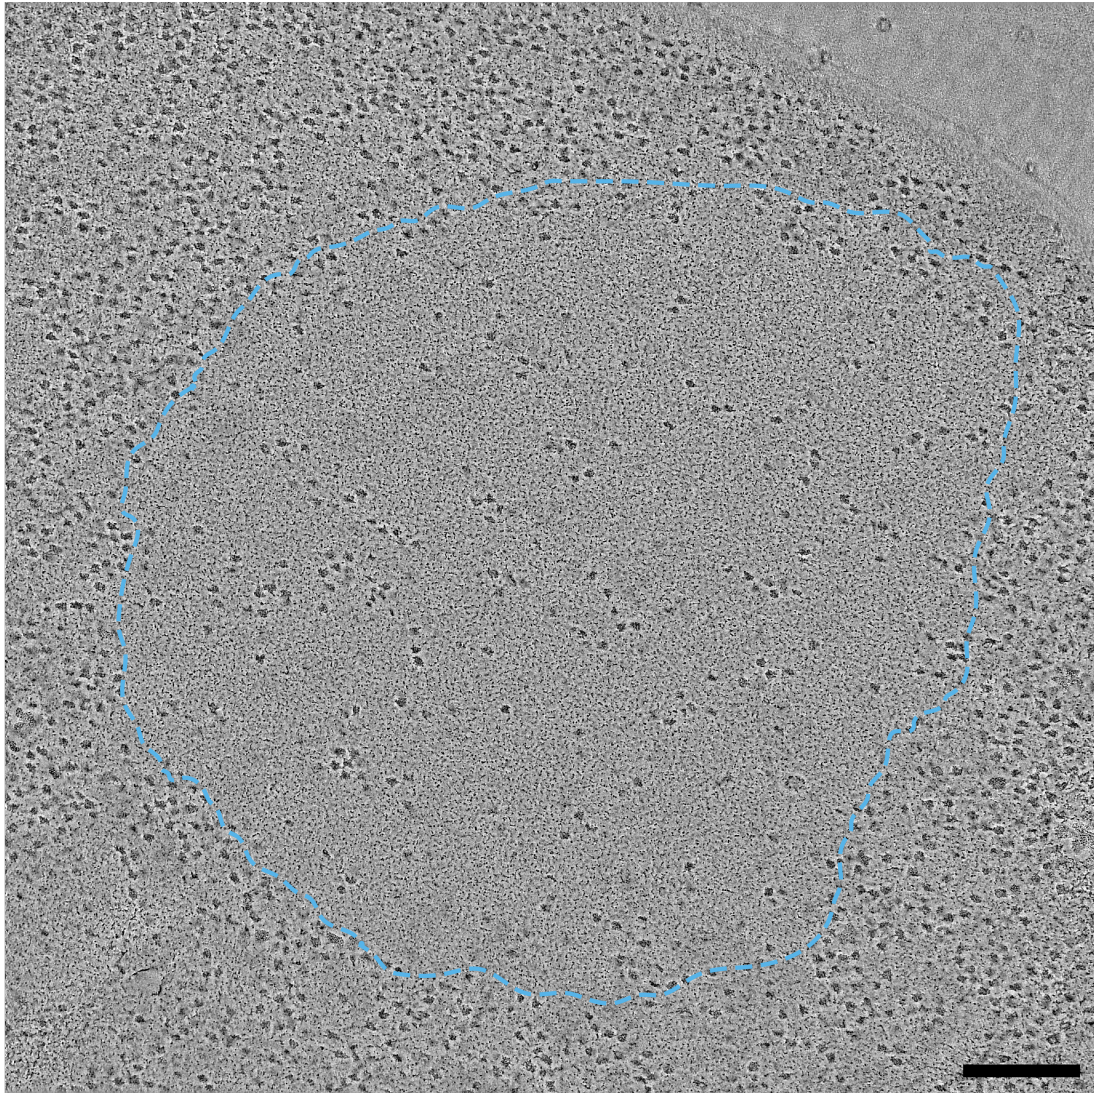

**Figure S4, related to Figure 4.**

Slice through a tomogram of a 25QP-GFP liquid-like assembly (outlined in blue) formed in a yeast cell. Scale bar, 200 nm.

Figure S5

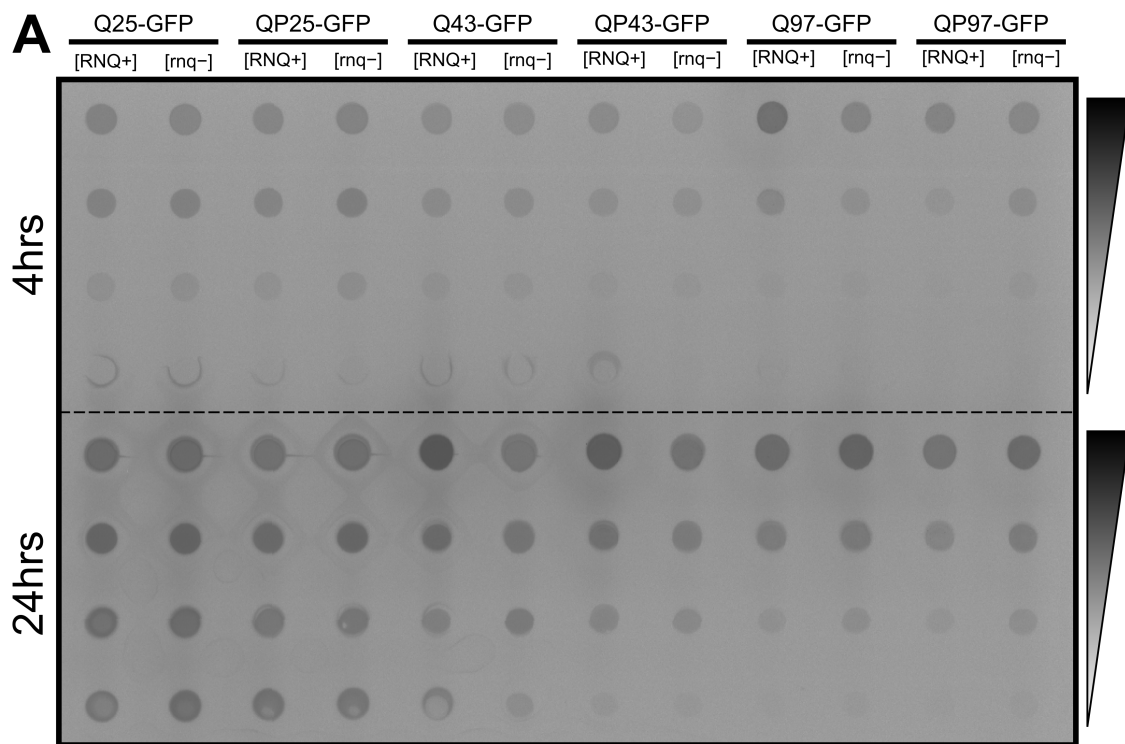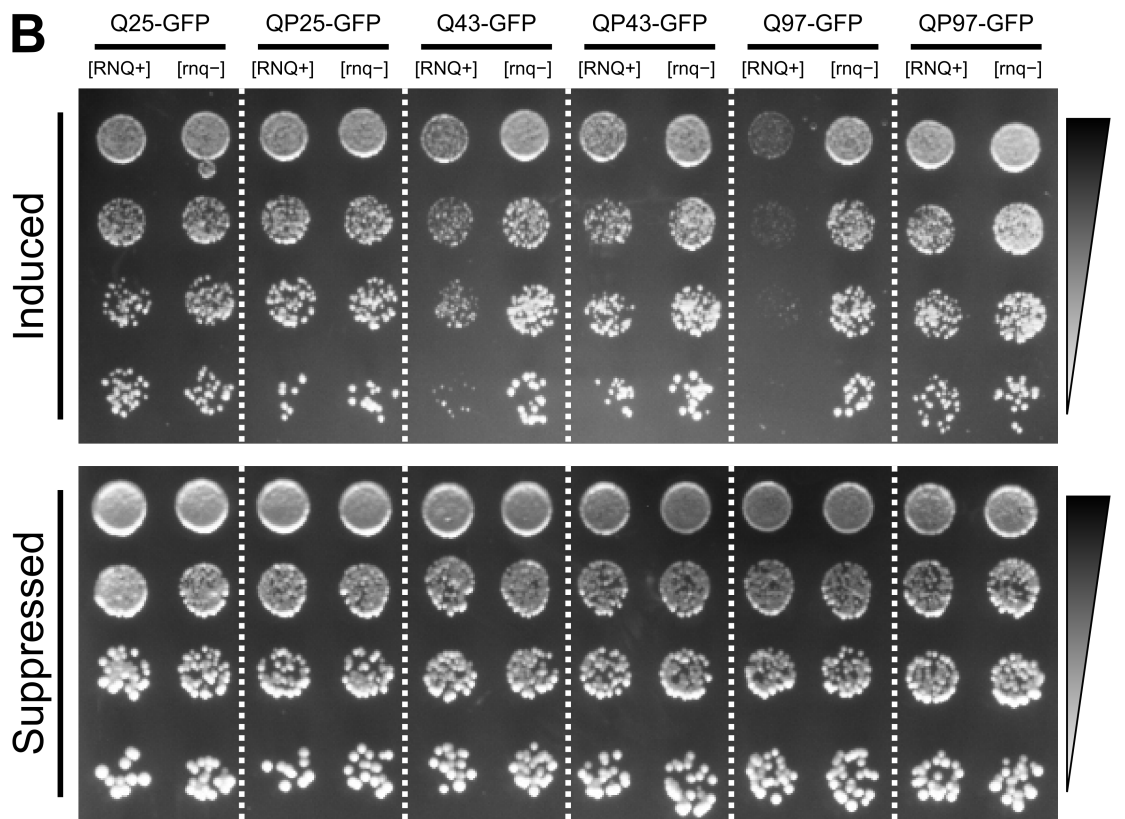



**Figure S5, related to Figure 5 and STAR Methods.**

(A) Dot blots of total HTT<sub>ex1</sub> extracted from yeast cells after 4 and 24 hrs induction. Each sample is blotted as 4x 5-fold serial dilutions. (B) Yeast growth-based toxicity assay. Equal volumes of the indicated samples were spotted onto synthetic dropout agar plates lacking leucine, as 4x 5-fold serial dilutions. HTT<sub>ex1</sub> proteins were induced or suppressed by using galactose or glucose, respectively, as the sole carbon source. As previously shown (Dehay and Bertolotti, 2006; Duennwald et al., 2006b), the proline-rich region suppresses toxicity; HTT<sub>ex1</sub> is only toxic in the [RNQ+] background (Meriin et al., 2002); and polyQ length correlates with toxicity in the [RNQ+] strains lacking the proline-rich region (Dehay and Bertolotti, 2006; Duennwald et al., 2006b).

Figure S6

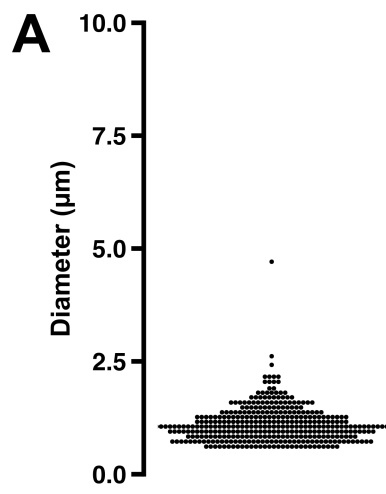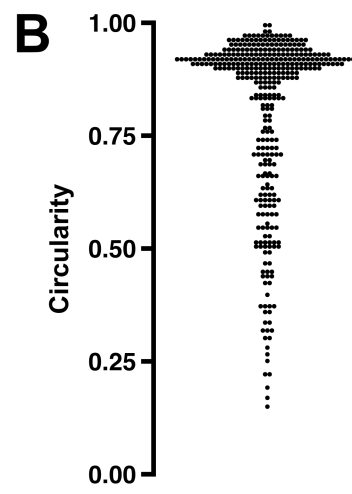

**C** 170 $\mu\text{M}$  25QP-GFP, 10% dextran

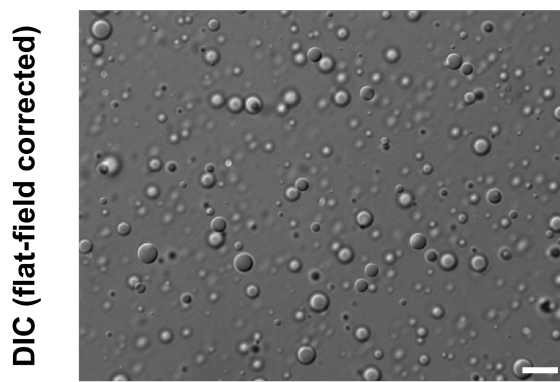

170 $\mu\text{M}$  BSA, 10% dextran

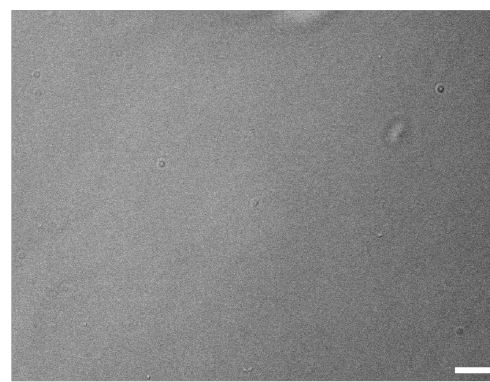

**D**

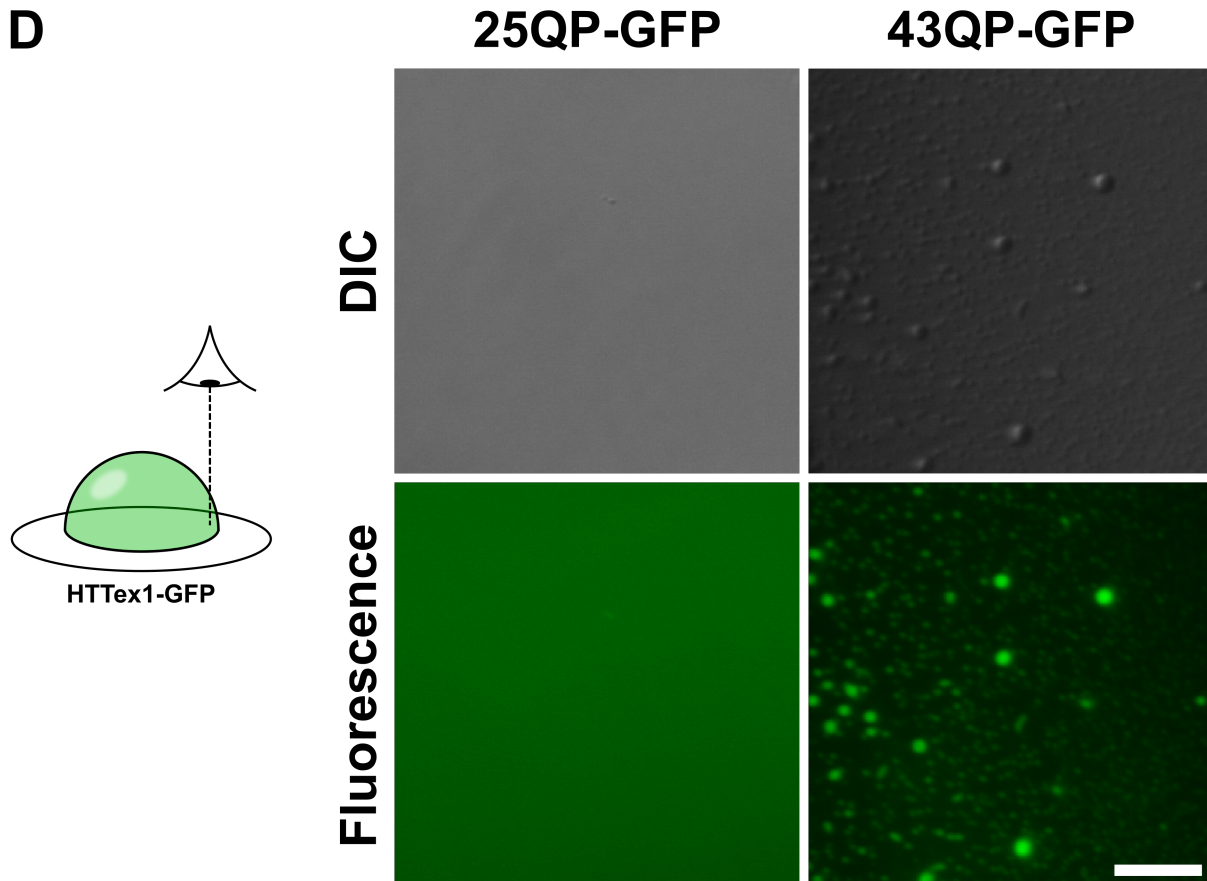

**Figure S6, related to Figure 6.**

(A) Diameters of droplets, where each dot represents a single droplet. (B) Circularity ratios of droplets, where each dot represents a single droplet. (C) BSA does not form droplets under crowding conditions that induce 25QP-GFP to form droplets. Images were flat-field corrected against a background image acquired in the presence of the buffer. Scale bar, 10  $\mu\text{m}$ . (D) Drops of purified 25QP-GFP and 43QP-GFP (60  $\mu\text{M}$ ) in the absence of crowding agent were placed on glass slides and imaged immediately at the sample edges. The 43QP-GFP sample formed micron sized assemblies with a variety of morphologies including rounded droplets and elongated spikes.

Figure S7

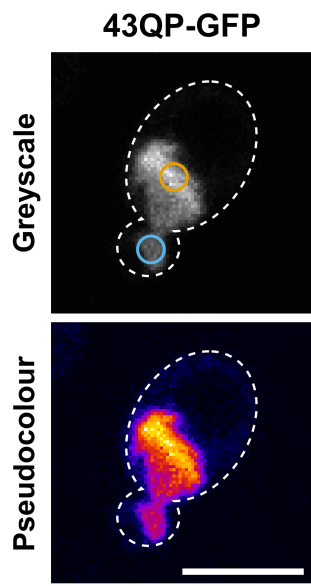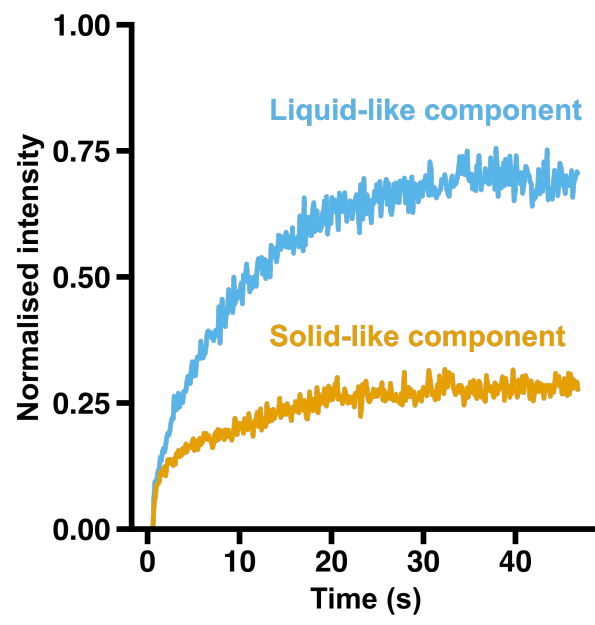

**Figure S7, related to Figure 7.**

The images show a 43QP-GFP LA in a yeast cell (white dotted outline), undergoing a conversion to an SA. FRAP was performed on the regions indicated by the blue and orange circles in the greyscale image. The graph (right) shows the resulting recovery curves, whose colours correspond to the bleach region circles. The pseudocolour image highlights the different fluorescence intensities in the liquid- and solid-like regions of the converting assembly. Scale bar, 5  $\mu\text{m}$ .

**Table S1 FRAP recovery curves modelled using first and second order exponential functions. Related to Figures 1G, 2B, 7C and S3A.**

| Sample                                  | Equation                          | A <sub>1</sub> | A <sub>2</sub> | τ <sub>1</sub> (s) | τ <sub>2</sub> (s) |
|-----------------------------------------|-----------------------------------|----------------|----------------|--------------------|--------------------|
| 43QP-GFP mammalian dim                  | 1 <sup>st</sup> order exponential | 0.83           | N/A            | 0.79               | N/A                |
| 43QP-GFP mammalian bright               | 1 <sup>st</sup> order exponential | 0.10           | N/A            | 0.96               | N/A                |
| 43QP-GFP yeast dim                      | 1 <sup>st</sup> order exponential | 0.86           | N/A            | 2.41               | N/A                |
| 43QP-GFP yeast bright                   | 1 <sup>st</sup> order exponential | 0.05           | N/A            | 1.06               | N/A                |
| 43QP-GFP yeast [RNQ <sup>+</sup> ]      | 1 <sup>st</sup> order exponential | 0.04           | N/A            | 1.30               | N/A                |
| 97QP-EOS yeast dim                      | 1 <sup>st</sup> order exponential | 0.50           | N/A            | 0.45               | N/A                |
| 97QP-EOS yeast bright                   | 1 <sup>st</sup> order exponential | 0.03           | N/A            | 11.04              | N/A                |
| 43QP-GFP yeast dim (dual assemblies)    | 2 <sup>nd</sup> order exponential | 168.8          | -0.0003        | -52.88             | -0.04              |
| 25QP-GFP <i>in vitro</i> droplet middle | 1 <sup>st</sup> order exponential | 0.46           | N/A            | 0.19               | N/A                |
| 25QP-GFP <i>in vitro</i> droplet edge   | 1 <sup>st</sup> order exponential | 0.22           | N/A            | 0.40               | N/A                |

1<sup>st</sup> order exponential:  $f(x) = A_1(1 - e^{(-\tau_1 x)})$

2<sup>nd</sup> order exponential:  $f(x) = A_1(1 - e^{(-\tau_1 x)}) + A_2(1 - e^{(-\tau_2 x)})$

**Table S2 FRAP instantaneous rates of recovery for data in Figure 2E.**

| Sample                  | Equation                         | p <sub>1</sub> | p <sub>2</sub> |
|-------------------------|----------------------------------|----------------|----------------|
| 43QP-GFP intra-assembly | 1 <sup>st</sup> order polynomial | 116.8          | 6.11           |
| 43QP-GFP inter-assembly | 1 <sup>st</sup> order polynomial | 2.13           | 115.0          |

1<sup>st</sup> order polynomial:  $f(x) = p_1x + p_2$

Instantaneous rates of recovery for a dim assembly due to (1) movement of 43QP-GFP within the assembly, and (2) transfer from a second dim assembly in the same cell, were obtained by fitting straight lines to the first few data points immediately after bleaching, or 2.6s after bleaching, respectively. Movement of 43QP-GFP is approximately 55-fold slower between assemblies than within individual assemblies.
